# Supplementary material for: Prevalence of Use and Knowledge about Tobacco Products and Their Harmful Effects among University Students in Southern Croatia
Source: MDPI journal article supplement (doi:10.3390/healthcare11050771), 2023-03-06
Supplement: s1 [file s1]

Supplementary file

**Table S1.** The frequency distribution (%) of respondents' answers about tobacco products and their adverse effects on human health

| Question                                                                                               | Answer |              |
|--------------------------------------------------------------------------------------------------------|--------|--------------|
|                                                                                                        | No     | I don't know |
| Smoking increases the risk of developing cancer (lungs, liver, pancreas, kidney, leukemia, throat...). | 0.8    | 8.6          |
| Smoking causes heart and blood vessel diseases.                                                        | 1.5    | 13.0         |
| Smoking causes lung diseases (chronic obstructive lung disease, chronic bronchitis).                   | 1.4    | 9.1          |
| Smoking is linked to cognitive deficiencies.                                                           | 8.8    | 42.1         |
| Smoking is linked to strokes.                                                                          | 4.6    | 26.5         |
| Smoking causes premature skin aging.                                                                   | 2.4    | 19.7         |
| Smoking causes eye diseases (increases the risk for age degeneration of the macula and cataract).      | 5.5    | 42.9         |
| Smoking decreases bone density which means a higher risk for broken bones, including hip fracture.     | 9.6    | 51.5         |
| Smoking increases the risk of rheumatoid arthritis.                                                    | 7.3    | 51.2         |
| Smoking increases teeth staining and bad breath.                                                       | 1.2    | 5.7          |
| Smoking causes changes in taste and smell.                                                             | 5.1    | 22.7         |
| Smoking causes oral carcinoma.                                                                         | 1.8    | 21.6         |
| Smoking increases the risk of periodontal diseases - periodontitis and tooth loss.                     | 3.0    | 19.0         |
| Smoking during pregnancy affects the child's health.                                                   | 1.4    | 6.9          |
| Exposure to passive smoking causes lung cancer.                                                        | 5.9    | 27.9         |
| Exposure to passive smoking causes heart and blood vessels diseases.                                   | 7.8    | 35.6         |
| Exposure to smoking is linked to cognitive deficiencies.                                               | 11.7   | 51.0         |
| Exposure to passive smoking causes ear infections in children.                                         | 12.6   | 55.8         |
| Exposure to passive smoking is linked with children's allergies.                                       | 7.0    | 45.8         |
| Exposure to passive smoking is linked with asthma in children.                                         | 4.5    | 36.9         |
| A cigarette burns at 800 degrees.                                                                      | 6.7    | 64.3         |
| A complex mixture called smoke occurs during cigarette burning.                                        | 1.5    | 14.7         |
| Tobacco heating devices use a tobacco insert.                                                          | 2.6    | 45.4         |
| During the heating of the tobacco insert smoke is not produced but aerosol.                            | 3.5    | 56.7         |
| Tobacco heating devices use real tobacco.                                                              | 11.4   | 57.4         |
| By heating tobacco 50% less of the harmful substances are released.                                    | 5.6    | 60.4         |
| E-cigarettes use fluid in which nicotine was synthetically added.                                      | 3.1    | 40.0         |
| Data are presented as percentage.                                                                      |        |              |
